# Supplementary material for: New perspectives in patient education for cardiac surgery using 3D-printing and virtual reality
Source: PubMed Central journal article supplement (PMC10020687; doi:10.3389/fcvm.2023.1092007), 2023-03-03
Supplement: Datasheet1.pdf [file Datasheet1.pdf]

## Questionnaire 1

Gender 

|      |        |         |
|------|--------|---------|
| male | female | diverse |
|------|--------|---------|

Age 

|       |
|-------|
| years |
|-------|

Do you have professional knowledge (e.g. job in medicine, biology) about the biology, anatomy and function of the heart? 

|     |    |
|-----|----|
| Yes | No |
|-----|----|

Have you had surgery before? 

|     |    |
|-----|----|
| Yes | No |
|-----|----|

Have you read up on or informed yourself on your impending surgery? 

|     |    |
|-----|----|
| Yes | No |
|-----|----|

| <i>Please rate the following sentences</i>                                         | Strongly disagree     | Disagree              | Agree                 | Strongly Agree        | Neither agree nor disagree |
|------------------------------------------------------------------------------------|-----------------------|-----------------------|-----------------------|-----------------------|----------------------------|
| I have solid knowledge about the anatomy and function of the heart.                | <input type="radio"/> | <input type="radio"/> | <input type="radio"/> | <input type="radio"/> | <input type="radio"/>      |
| I know the basic anatomy of the cardiovascular system.                             | <input type="radio"/> | <input type="radio"/> | <input type="radio"/> | <input type="radio"/> | <input type="radio"/>      |
| I understand my individual cardiac pathology and disease.                          | <input type="radio"/> | <input type="radio"/> | <input type="radio"/> | <input type="radio"/> | <input type="radio"/>      |
| I know which part of my heart carries the pathology.                               | <input type="radio"/> | <input type="radio"/> | <input type="radio"/> | <input type="radio"/> | <input type="radio"/>      |
| I have a good knowledge about the surgical procedure.                              | <input type="radio"/> | <input type="radio"/> | <input type="radio"/> | <input type="radio"/> | <input type="radio"/>      |
| I want a detailed patient education about the surgical steps.                      | <input type="radio"/> | <input type="radio"/> | <input type="radio"/> | <input type="radio"/> | <input type="radio"/>      |
| I understand the positive effect the surgery will have on my health.               | <input type="radio"/> | <input type="radio"/> | <input type="radio"/> | <input type="radio"/> | <input type="radio"/>      |
| I'm confident to explain the main steps of the surgical procedure to someone else. | <input type="radio"/> | <input type="radio"/> | <input type="radio"/> | <input type="radio"/> | <input type="radio"/>      |

**Please rate your current anxiety level in regard to the surgery on the following scale 1 to 10:**

|   |   |   |   |   |   |   |   |   |    |
|---|---|---|---|---|---|---|---|---|----|
| 1 | 2 | 3 | 4 | 5 | 6 | 7 | 8 | 9 | 10 |
|---|---|---|---|---|---|---|---|---|----|



1 = No anxiety 10 = Extreme anxiety

*Please give the answer which seems to describe your **present** feeling best.*

**Not at all      Somewhat      Moderately so      Very much so**

---

I feel calm

                

---

I am tense

                

---

I feel at ease

                

---

I am presently worrying over possible misfortunes

                

---

I am frightened

                

---

I feel nervous

                

---

I am jittery

                

---

I am relaxed

                

---

I am worried

                

---

I feel steady
