# Supplementary material for: New perspectives in patient education for cardiac surgery using 3D-printing and virtual reality
Source: PubMed Central journal article supplement (PMC10020687; doi:10.3389/fcvm.2023.1092007), 2023-03-03
Supplement: Datasheet2.pdf [file Datasheet2.pdf]

## Questionnaire 2

| <i>Please rate the following sentences</i>                                         | <b>Strongly disagree</b> | <b>Disagree</b>       | <b>Agree</b>          | <b>Strongly Agree</b> | <b>Neither agree nor disagree</b> |
|------------------------------------------------------------------------------------|--------------------------|-----------------------|-----------------------|-----------------------|-----------------------------------|
| I have solid knowledge about the anatomy and function of the heart.                | <input type="radio"/>    | <input type="radio"/> | <input type="radio"/> | <input type="radio"/> | <input type="radio"/>             |
| I know the basic anatomy of the cardiovascular system.                             | <input type="radio"/>    | <input type="radio"/> | <input type="radio"/> | <input type="radio"/> | <input type="radio"/>             |
| I understand my individual cardiac pathology and disease.                          | <input type="radio"/>    | <input type="radio"/> | <input type="radio"/> | <input type="radio"/> | <input type="radio"/>             |
| I know which part of my heart carries the pathology.                               | <input type="radio"/>    | <input type="radio"/> | <input type="radio"/> | <input type="radio"/> | <input type="radio"/>             |
| I have a good knowledge about the surgical procedure.                              | <input type="radio"/>    | <input type="radio"/> | <input type="radio"/> | <input type="radio"/> | <input type="radio"/>             |
| I want a detailed patient education about the surgical steps.                      | <input type="radio"/>    | <input type="radio"/> | <input type="radio"/> | <input type="radio"/> | <input type="radio"/>             |
| I understand the positive effect the surgery will have on my health.               | <input type="radio"/>    | <input type="radio"/> | <input type="radio"/> | <input type="radio"/> | <input type="radio"/>             |
| I'm confident to explain the main steps of the surgical procedure to someone else. | <input type="radio"/>    | <input type="radio"/> | <input type="radio"/> | <input type="radio"/> | <input type="radio"/>             |

Please rate your current anxiety level in regard to the surgery on the following scale 1 to 10:

|   |   |   |   |   |   |   |   |   |    |
|---|---|---|---|---|---|---|---|---|----|
| 1 | 2 | 3 | 4 | 5 | 6 | 7 | 8 | 9 | 10 |
|---|---|---|---|---|---|---|---|---|----|

1 = No anxiety

10 = Extreme anxiety

*Please give the answer which seems to describe your **present** feeling best.*

**Not at all      Somewhat      Moderately so      Very much so**

---

I feel calm

                

---

I am tense

                

---

I feel at ease

                

---

I am presently worrying over possible misfortunes

                

---

I am frightened

                

---

I feel nervous

                

---

I am jittery

                

---

I am relaxed

                

---

I am worried

                

---

I feel steady
