# Supplementary material for: New perspectives in patient education for cardiac surgery using 3D-printing and virtual reality
Source: PubMed Central journal article supplement (PMC10020687; doi:10.3389/fcvm.2023.1092007), 2023-03-03
Supplement: Datasheet3.pdf [file Datasheet3.pdf]

### Questionnaire 3

*Please give the answer which seems to describe your **general** feeling.*

|                                                                                         | <b>Almost never</b>   | <b>Sometimes</b>      | <b>Often</b>          | <b>Almost always</b>  |
|-----------------------------------------------------------------------------------------|-----------------------|-----------------------|-----------------------|-----------------------|
| I feel nervous and restless                                                             | <input type="radio"/> | <input type="radio"/> | <input type="radio"/> | <input type="radio"/> |
| I feel satisfied with myself                                                            | <input type="radio"/> | <input type="radio"/> | <input type="radio"/> | <input type="radio"/> |
| I wish I could be as happy as others seem to be                                         | <input type="radio"/> | <input type="radio"/> | <input type="radio"/> | <input type="radio"/> |
| I feel like a failure                                                                   | <input type="radio"/> | <input type="radio"/> | <input type="radio"/> | <input type="radio"/> |
| I worry too much over something that really doesn't matter                              | <input type="radio"/> | <input type="radio"/> | <input type="radio"/> | <input type="radio"/> |
| I lack self-confidence                                                                  | <input type="radio"/> | <input type="radio"/> | <input type="radio"/> | <input type="radio"/> |
| I feel secure                                                                           | <input type="radio"/> | <input type="radio"/> | <input type="radio"/> | <input type="radio"/> |
| I feel inadequate                                                                       | <input type="radio"/> | <input type="radio"/> | <input type="radio"/> | <input type="radio"/> |
| I am a steady person                                                                    | <input type="radio"/> | <input type="radio"/> | <input type="radio"/> | <input type="radio"/> |
| I get in a state of tension or turmoil as I think over my recent concerns and interests | <input type="radio"/> | <input type="radio"/> | <input type="radio"/> | <input type="radio"/> |
